# Supplementary material for: Near-UV Light Induced ROS Production Initiates Spatial Ca2+ Spiking to Fire NFATc3 Translocation
Source: MDPI journal article supplement (doi:10.3390/ijms22158189), 2021-07-30
Supplement: s1 [file s1]

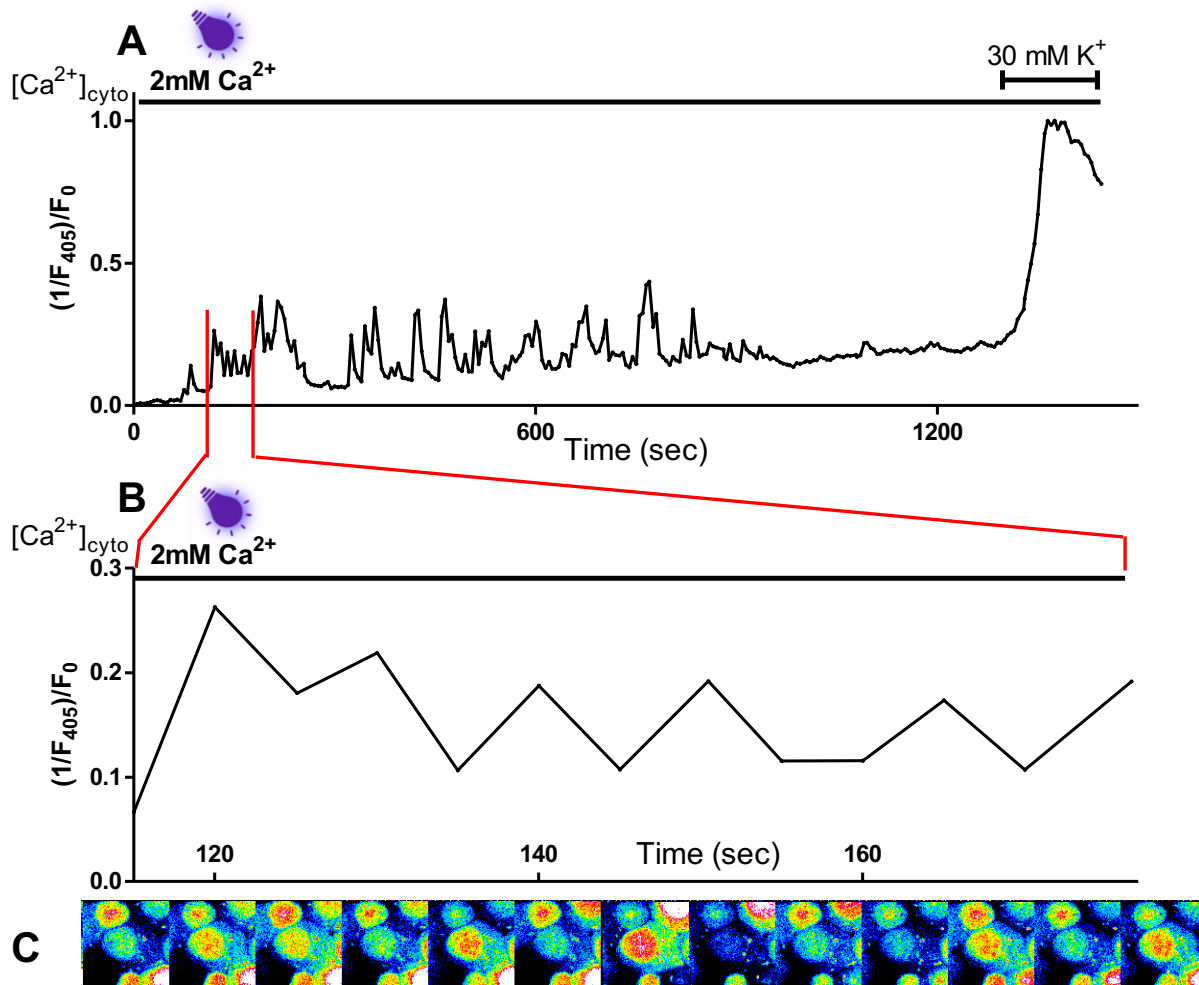

**Supplementary Figure 1. Exemplary Cytosolic  $Ca^{2+}$  spiking.** Representative trace of repetitive cytosolic  $Ca^{2+}$  spiking measured with Fura-2 by exciting the cells with 405 nm laser line (A). The time point between 115 to 180 seconds of trace (A) was plotted over 65 seconds (B) and the respective montage of the  $Ca^{2+}$  spiking was shown (C). The whole movie of the  $Ca^{2+}$  spiking of the same cell and respective GFPNFATc3 translocation is added to supplementary video 3 and indicated as Control +UV.

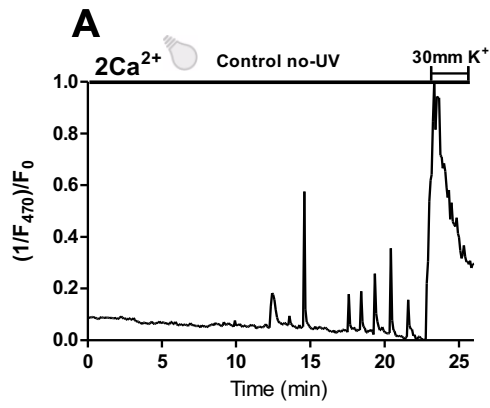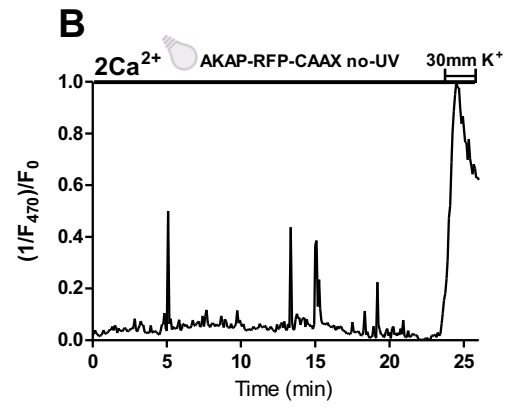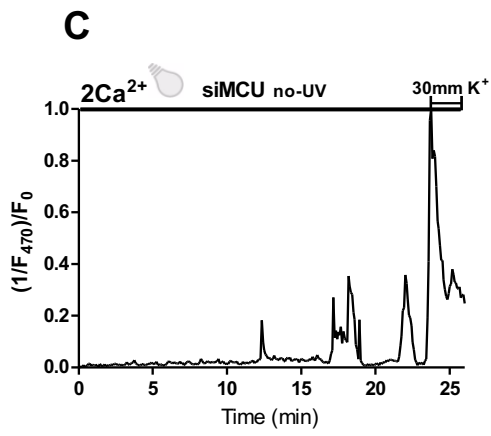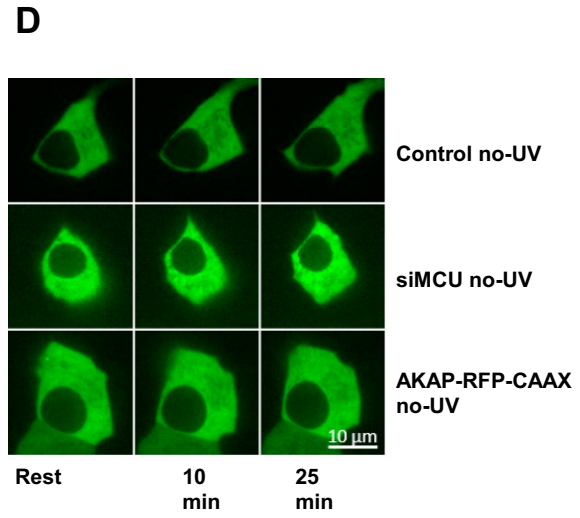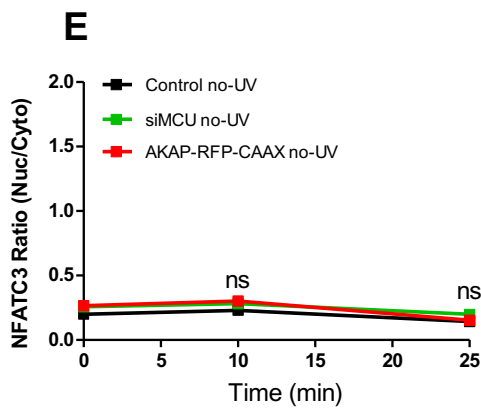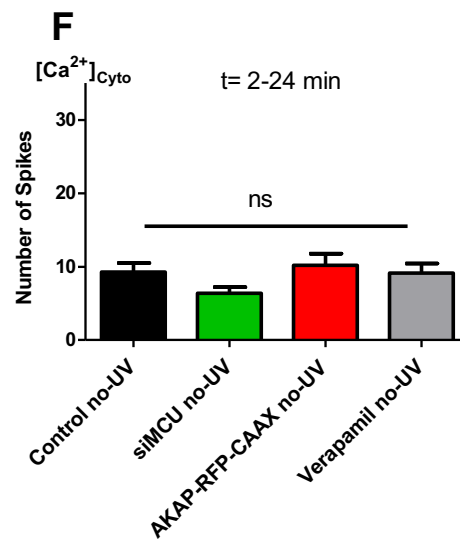

**Supplementary Figure 2. Absence of UV induction keeps NFATc3 in cytosol.**

Representative trace of cytosolic  $\text{Ca}^{2+}$  spikes (black trace) measured with Fluo-4 by exciting the cells with 470 nm laser line in the cells perfused with 2 mM extracellular  $\text{Ca}^{2+}$  solution in Control no-UV (A), AKAP-RFP-CAAX no-UV (B) and siMCU no-UV (C). Representative images indicate the translocation of GFP-NFATc3 translocation in INS-1 cells perfused at 2mM external  $\text{Ca}^{2+}$  solution without UV (D). Time course of GFP-NFATc3 translocation as  $\text{MEAN} \pm \text{SEM}$  in Control no-UV (black), AKAP-RFP-CAAX no-UV (red) and siMCU no-UV (green) assessed by the ratio of nucleus to the cytosol (E). Bar graphs represent the occurrence of cytosolic  $\text{Ca}^{2+}$  spiking calculated in the time point between the 2 and 24 minutes (F). Significant differences were assessed using one-way ANOVA with Tukey's multiple comparison test and presented as specific p-values (n.s. – not significant). Control no-UV (n=21), AKAP-RFP-CAAX no-UV (n=21), siMCU no-UV (n=25) and Verapamil no-UV (n=23) for cytosolic  $\text{Ca}^{2+}$  measurement and Control no-UV (n=13), AKAP-RFP-CAAX no-UV (n=11), siMCU no-UV (n=10) for GFP-NFATc3 translocation.

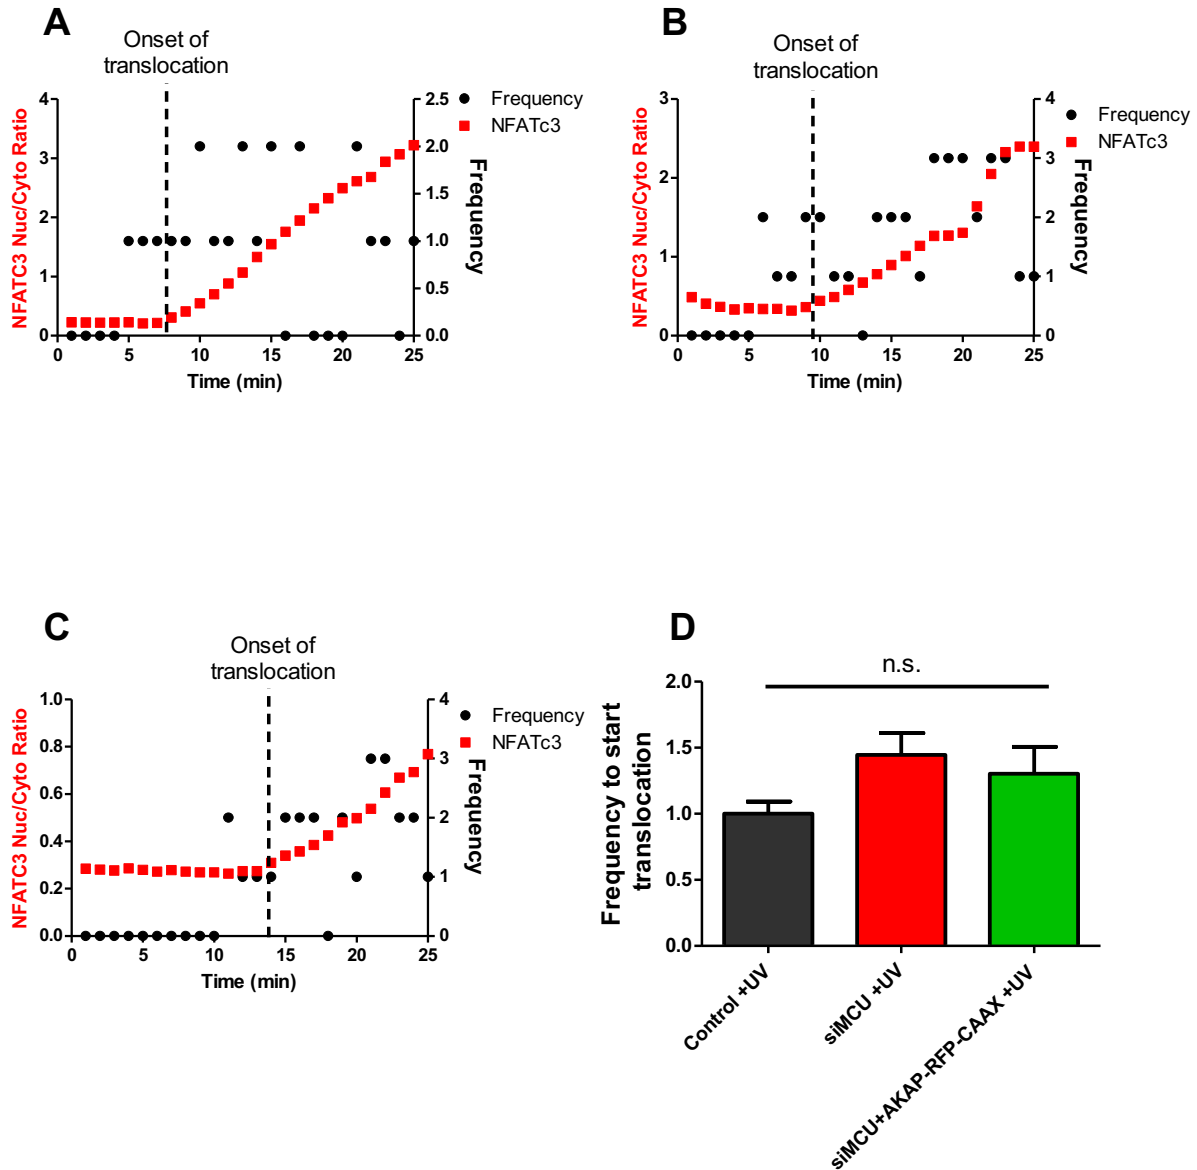

**Supplementary Figure 3. Dependency of NFATc3 translocation to number of cytosolic  $\text{Ca}^{2+}$  Spiking.** Cytosolic  $\text{Ca}^{2+}$  spiking frequency of 3 minutes leading to the onset of NFATc3 translocation to the nucleus was quantified in Control +UV (A), siMCU +UV (B) and siMCU+AKAP-RFP-CAAX +UV (C). Bar graphs represent the frequency of  $\text{Ca}^{2+}$  spiking (D). Significant differences were assessed using one-way ANOVA with Tukey's multiple comparison test and presented as specific p-values (n.s. – not significant). Control +UV (n=18), siMCU +UV (n=12) and AKAP-RFP-CAAX +UV (n=21).

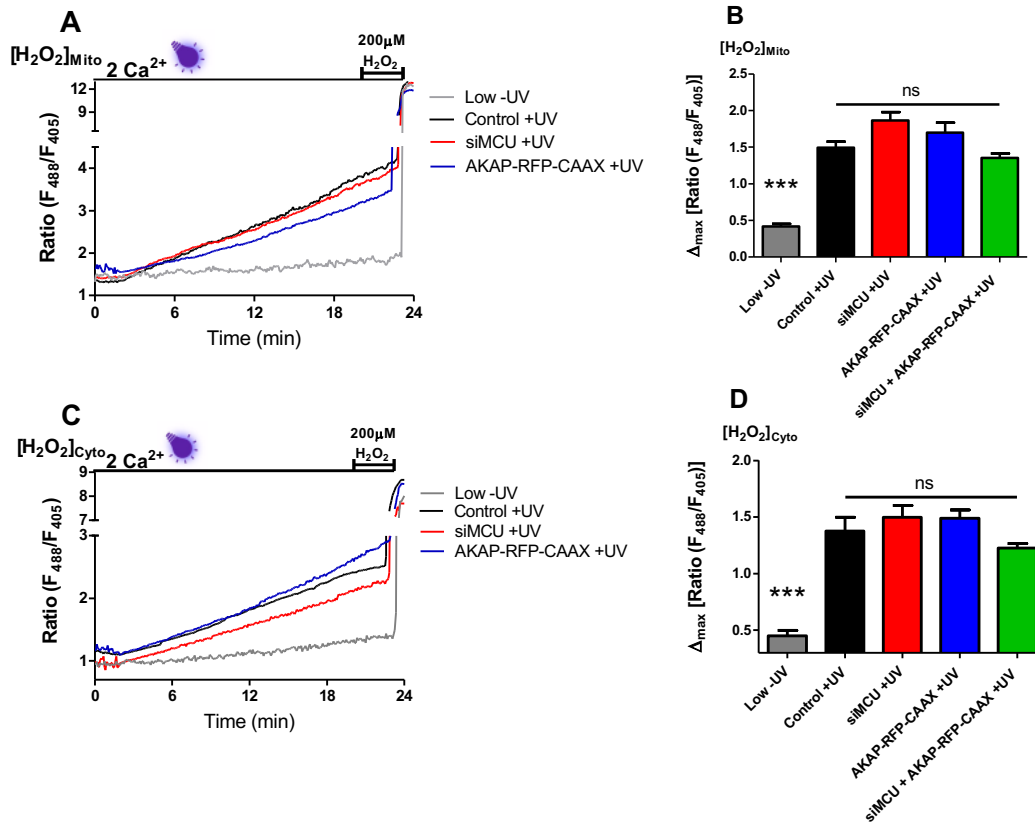

**Supplementary Figure 4. High near UV light induces mitochondrial and cytosolic ROS production in siMCU, AKAP-RFP-CAAX and siMCU + AKAP-RFP-CAAX conditions.** Representative traces show the production of  $H_2O_2$  in mitochondria (A) and cytosol (C) following the excitation of cells with 5 mW of 405 nm laser line (low-UV) and 20 mW of 405 nm laser line (Control +UV, siMCU +UV and AKAP-RFP-CAAX +UV). Bar graphs represent MEAN  $\pm$  SEM of  $H_2O_2$  levels in low-UV (gray), control +UV (black), siMCU +UV (red), AKAP-RFP-CAAX +UV (blue) and siMCU + AKAP-RFP-CAAX +UV (green) in mitochondria (B) and cytosol (D). Significant differences were assessed using one-way ANOVA with Tukey's multiple comparison test and presented as specific p-values (\*\*\*)  $p < 0.001$ , n.s. – not significant). Low-UV (n=24), Control +UV (n=46), siMCU +UV (n=19), AKAP-RFP-CAAX +UV (n=28) and siMCU + AKAP-RFP-CAAX +UV (n=13) in mitochondria and Low-UV (n=20), Control +UV (n=21), siMCU +UV (n=15), AKAP-RFP-CAAX +UV (n=16) and siMCU + AKAP-RFP-CAAX +UV (n=16) in cytosol.

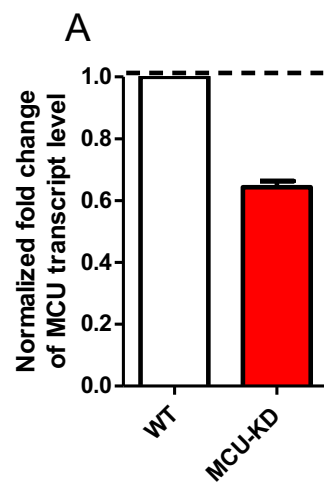

Supplementary Figure 5. Knock-down efficiency of MCU siRNA in INS-1 cells.
