# Supplementary material for: Near-UV Light Induced ROS Production Initiates Spatial Ca2+ Spiking to Fire NFATc3 Translocation
Source: MDPI journal article supplement (doi:10.3390/ijms22158189), 2021-07-30
Supplement: s1 [file s1]

**Video 1. Bi-phasic regulation of nuclear GFP-NFATc3 translocation in INS-1 cells.**

Representative 24-minutes-long videos show simultaneously measured cytosolic  $\text{Ca}^{2+}$  oscillations and GFPNFATc3 translocation to the nucleus in Control +UV (upper left), 10  $\mu\text{M}$  Verapamil +UV (upper right), 2  $\mu\text{M}$  Oligomycin +UV (lower left), and no-stimulation +UV (lower right). Cells were perfused with 2 mM extracellular  $\text{Ca}^{2+}$  solution in the presence of near UV light induction for each 5 seconds and stimulated with CCh for 3 min as indicated in the movie.

**Video 2. Near UV light induces repetitive cytosolic  $\text{Ca}^{2+}$  oscillations and GFP-NFATc3 translation to the nucleus via activation of L-type  $\text{Ca}^{2+}$  channels.**

Representative 24-minutes-long videos show simultaneously measured cytosolic  $\text{Ca}^{2+}$  oscillations and GFPNFATc3 translocation to the nucleus in Control +UV (left), 2  $\mu\text{M}$  Oligomycin +UV (right) and 10  $\mu\text{M}$  Verapamil +UV (middle). Cells were perfused with 2 mM extracellular  $\text{Ca}^{2+}$  solution in the presence of near UV light induction for each 5 seconds.

**Video 3. Near UV-induced cytosolic  $\text{Ca}^{2+}$  oscillations and GFP-NFATc3 translocation to the nucleus are diminished by the application of a ROS scavenger.**

Representative 24-minutes-long videos show simultaneously measured cytosolic  $\text{Ca}^{2+}$  oscillations and GFPNFATc3 translocation to the nucleus in Control +UV (left) and 1 mM NAC +UV (right). Cells were perfused with 2 mM extracellular  $\text{Ca}^{2+}$  solution in the presence of near UV light induction for each 5 seconds.

**Video 4. Effect of an enhancement of subplasmalemmal mitochondria's  $\text{Ca}^{2+}$  buffering ability on near UV-induced cytosolic  $\text{Ca}^{2+}$  oscillations and GFP-NFATc3 translocation to the nucleus.**

Representative 24-minutes-long videos show simultaneously measured cytosolic  $\text{Ca}^{2+}$  oscillations and GFPNFATc3 translocation to the nucleus in Control +UV (upper left), AKAP-RFP-CAAX +UV (upper right), AKAP-RFP-CAAX + MCUsi + UV (lower left), and MCUsi +UV (lower right). Cells were perfused with 2 mM extracellular  $\text{Ca}^{2+}$  solution in the presence of near UV light induction for each 5 seconds.
