# Supplementary material for: Near-UV Light Induced ROS Production Initiates Spatial Ca2+ Spiking to Fire NFATc3 Translocation
Source: Int J Mol Sci. 2021 Jul 30;22(15):8189. doi: 10.3390/ijms22158189 (PMC8346968; doi:10.3390/ijms22158189)
Supplement: Supplementary file 1 [file ijms-22-08189-s001.zip]

Archive with 6 entries (6 files):
- Moive Legends _01.pdf
- Suplementary File.pdf
- Supplementary Video 1.avi
- Supplementary Video 2.avi
- Supplementary Video 3.avi
- Supplementary Video 4.avi
